# Supplementary material for: Tau Cleavage Contributes to Cognitive Dysfunction in Strepto-Zotocin-Induced Sporadic Alzheimer’s Disease (sAD) Mouse Model
Source: MDPI journal article supplement (doi:10.3390/ijms222212158), 2021-11-10
Supplement: s1 [file s1]

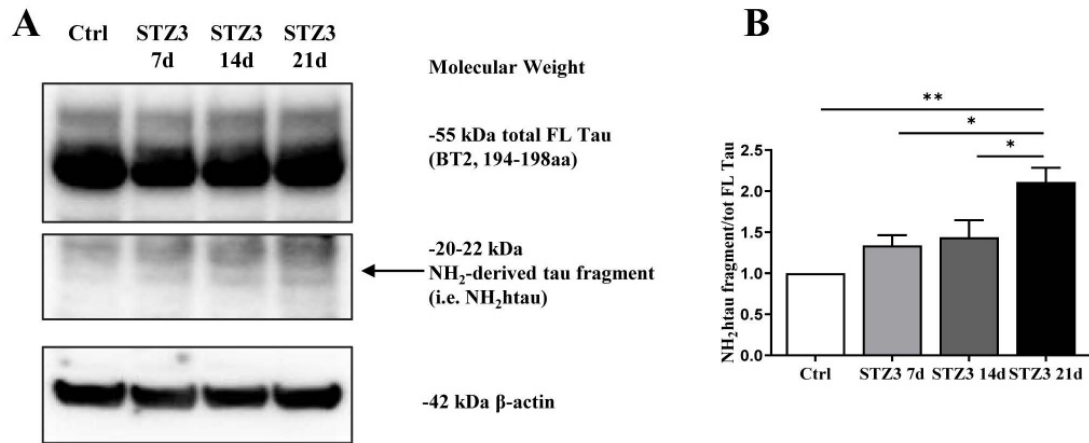

**Figure S1** . The neurotoxic 20-22kDa NH<sub>2</sub>htau peptide gradually accumulates into animals' hippocampus following continuous STZ injection. (A) Hippocampal protein homogenates from naïve untreated mice (Ctrl) and mice injected with 3mg/Kg STZ (STZ 3) for 7, 14, 21 days were analyzed by SDS-PAGE Western blotting with BT2, the pan-tau antibody directed against the 194-198 amino acids of full-length protein, to detect the steady-state expression level of the neurotoxic 20-22kDa NH<sub>2</sub>htau peptide over time. (B) Semi-quantitative densitometry of the intensity signals of bands was carried out following normalization with  $\beta$ -actin level used as loading control. Values are from at least three independent experiments and statistically significant differences were calculated by one-way ANOVA followed by Bonferroni's post-hoc test for multiple comparison among more than two groups.  $p < 0.05$  was accepted as statistically significant (\* $p < 0.05$ ; \*\* $p < 0.01$ ).
